# Supplementary material for: Berberine Alleviates Non-alcoholic Steatohepatitis Through Modulating Gut Microbiota Mediated Intestinal FXR Activation
Source: PubMed Central journal article supplement (PMC8484326; doi:10.3389/fphar.2021.750826), 2021-09-17
Supplement: DataSheet1.pdf [file DataSheet1.pdf]

## Supplementary Material

**Supplementary Table 1 Fecal BA levels**

| Metabolites (nmol/mg) | cholic acid | chenodeoxycholic acid | ursodeoxycholic acid | deoxycholic acid | tauro $\alpha$ -muricholic acid | tauro $\beta$ -muricholic acid | tauro $\omega$ -muricholic acid | taurocholic acid | taurochenodeoxycholic acid | tauroursodeoxycholic acid | taurodeoxycholic acid | tauro $\alpha$ -muricholic acid | tauro $\beta$ -muricholic acid | tauro $\omega$ -muricholic acid |
|-----------------------|-------------|-----------------------|----------------------|------------------|---------------------------------|--------------------------------|---------------------------------|------------------|----------------------------|---------------------------|-----------------------|---------------------------------|--------------------------------|---------------------------------|
| Abbreviation          | CA          | CDCA                  | UDCA                 | DCA              | $\alpha$ MCA                    | $\beta$ MCA                    | $\omega$ MCA                    | TCA              | TCDCa                      | TUDCA                     | TDCA                  | T $\alpha$ MCA                  | T $\beta$ MCA                  | T $\omega$ MCA                  |
| C1                    | 0.850       | 2.013                 | 0.723                | 0.231            | 8.254                           | 35.216                         | 8.021                           | 3025.184         | 4082.659                   | 501.901                   | 6.892                 | 198.138                         | 256.039                        | 2850.776                        |
| C2                    | 1.056       | 0.956                 | 1.058                | 0.562            | 1.025                           | 36.014                         | 3.019                           | 1820.362         | 7833.201                   | 1112.089                  | 6.100                 | 312.050                         | 383.951                        | 4524.918                        |
| C3                    | 1.944       | 1.330                 | 2.014                | 0.802            | 6.192                           | 20.901                         | 1.904                           | 3184.240         | 2922.560                   | 990.882                   | 2.169                 | 360.842                         | 422.743                        | 6712.263                        |
| C4                    | 0.965       | 0.877                 | 1.432                | 0.112            | 6.025                           | 18.235                         | 2.448                           | 3882.364         | 8702.364                   | 665.024                   | 8.254                 | 164.984                         | 216.885                        | 6812.281                        |
| C5                    | 0.953       | 1.109                 | 0.816                | 0.509            | 2.039                           | 16.951                         | 1.673                           | 3308.276         | 6101.255                   | 852.369                   | 1.125                 | 252.330                         | 304.231                        | 3968.931                        |
| C6                    | 0.838       | 0.782                 | 0.759                | 0.208            | 2.356                           | 12.320                         | 1.439                           | 2306.103         | 3044.702                   | 752.387                   | 1.591                 | 152.348                         | 280.249                        | 5459.919                        |
| C7                    | 1.152       | 1.437                 | 2.054                | 0.372            | 5.814                           | 15.703                         | 1.604                           | 3108.627         | 4021.369                   | 1109.036                  | 6.091                 | 288.097                         | 339.998                        | 3361.796                        |
| C8                    | 0.980       | 1.346                 | 0.703                | 0.219            | 1.591                           | 15.023                         | 1.719                           | 2703.022         | 6025.870                   | 1100.025                  | 5.814                 | 301.986                         | 353.887                        | 5071.984                        |
| M1                    | 6.141       | 5.736                 | 0.745                | 0.916            | 15.216                          | 306.216                        | 3.606                           | 2350.739         | 862.050                    | 711.054                   | 5.724                 | 385.176                         | 801.359                        | 2410.113                        |
| M2                    | 3.607       | 4.944                 | 2.952                | 1.224            | 14.424                          | 614.424                        | 4.479                           | 3624.881         | 760.842                    | 859.846                   | 13.809                | 423.969                         | 2385.237                       | 4084.255                        |
| M3                    | 4.807       | 1.013                 | 0.979                | 1.507            | 20.493                          | 310.493                        | 1.650                           | 2212.227         | 104.984                    | 563.988                   | 4.181                 | 210.111                         | 803.362                        | 2271.600                        |
| M4                    | 7.829       | 4.510                 | 2.206                | 0.578            | 16.578                          | 846.578                        | 2.784                           | 2560.245         | 852.330                    | 651.334                   | 5.146                 | 285.456                         | 2309.274                       | 2371.618                        |
| M5                    | 7.170       | 1.031                 | 2.023                | 0.451            | 29.449                          | 829.449                        | 2.316                           | 2958.894         | 752.348                    | 801.352                   | 9.447                 | 281.474                         | 1307.100                       | 3128.268                        |
| M6                    | 8.908       | 0.435                 | 0.597                | 2.085            | 19.915                          | 772.915                        | 5.239                           | 1109.883         | 1188.097                   | 1007.101                  | 9.069                 | 341.223                         | 788.625                        | 5109.256                        |
| M7                    | 8.116       | 4.235                 | 2.144                | 1.016            | 15.115                          | 684.415                        | 3.117                           | 1800.759         | 2001.986                   | 700.990                   | 8.405                 | 555.112                         | 784.019                        | 2901.132                        |
| M8                    | 6.885       | 3.158                 | 1.666                | 1.198            | 14.138                          | 594.138                        | 3.625                           | 3101.947         | 813.847                    | 652.851                   | 6.455                 | 430.074                         | 962.854                        | 1611.320                        |

|    |          |         |         |         |       |          |         |          |          |         |       |         |         |          |
|----|----------|---------|---------|---------|-------|----------|---------|----------|----------|---------|-------|---------|---------|----------|
| B1 | 202.138  | 348.384 | 95.213  | 163.877 | 6.069 | 714.538  | 425.894 | 2309.890 | 2163.045 | 171.102 | 3.602 | 306.550 | 376.848 | 4521.115 |
| B2 | 270.379  | 129.129 | 203.420 | 472.085 | 5.277 | 722.746  | 118.240 | 3984.032 | 2271.063 | 483.310 | 5.388 | 214.758 | 212.933 | 6035.257 |
| B3 | 603.938  | 36.783  | 99.490  | 168.154 | 9.346 | 732.815  | 168.805 | 2171.378 | 2227.712 | 979.379 | 1.458 | 310.827 | 295.804 | 4350.603 |
| B4 | 102.0729 | 386.218 | 65.575  | 274.239 | 6.143 | 1254.900 | 138.818 | 2271.396 | 1008.701 | 715.464 | 4.954 | 146.912 | 229.270 | 4482.621 |
| B5 | 116.017  | 516.205 | 112.446 | 687.110 | 1.863 | 587.771  | 357.103 | 3028.045 | 2800.577 | 592.335 | 1.475 | 829.783 | 150.770 | 5239.270 |
| B6 | 705.110  | 197.921 | 121.912 | 130.576 | 9.258 | 781.237  | 262.969 | 1001.034 | 1510.765 | 641.801 | 0.880 | 173.249 | 260.493 | 7220.259 |
| B7 | 174.197  | 72.054  | 73.412  | 142.076 | 4.568 | 692.738  | 106.130 | 2800.910 | 2309.558 | 553.301 | 3.880 | 204.749 | 372.571 | 1012.135 |
| B8 | 422.258  | 498.893 | 83.134  | 151.799 | 3.491 | 662.460  | 181.825 | 1511.098 | 3903.700 | 463.024 | 6.181 | 594.471 | 680.779 | 3722.323 |

C-CON group, M-NASH group, B-BBR group

**Supplementary Table 2 Serum BA levels**

| Metabolites (μM) | cholic acid | chenodeoxycholic acid | ursodeoxycholic acid | deoxycholic acid | tauro α-muricholic acid | tauro β-muricholic acid | tauro ω-muricholic acid | tauro-cholic acid | tauro-chenodeoxycholic acid | tauro-ursodeoxycholic acid | tauro-deoxycholic acid | tauro α-muricholic acid | tauro β-muricholic acid | tauro ω-muricholic acid |
|------------------|-------------|-----------------------|----------------------|------------------|-------------------------|-------------------------|-------------------------|-------------------|-----------------------------|----------------------------|------------------------|-------------------------|-------------------------|-------------------------|
| Abbreviation     | CA          | CDCA                  | UDCA                 | DCA              | αMCA                    | βMCA                    | ωMCA                    | TCA               | TCDCA                       | TUDCA                      | TDCA                   | TαMCA                   | TβMCA                   | TωMCA                   |
| C1               | 0.084962    | 0.009158              | 0.008935             | 0.431000         | 0.061200                | 0.197492                | 0.023406                | 0.096374          | 0.185672                    | 0.435428                   | 0.466385               | 0.082586                | 0.014753                | 0.021685                |
| C2               | 0.655534    | 0.085689              | 0.085466             | 0.561900         | 0.060678                | 0.150607                | 0.014757                | 0.065860          | 0.238759                    | 0.964800                   | 0.622932               | 0.064371                | 0.017295                | 0.031131                |
| C3               | 0.104379    | 0.090667              | 0.010444             | 0.802300         | 0.069097                | 0.207452                | 0.018977                | 0.056640          | 0.163162                    | 0.859645                   | 0.766858               | 0.297829                | 0.021292                | 0.039815                |
| C4               | 0.045490    | 0.005978              | 0.005756             | 0.501300         | 0.066877                | 0.162289                | 0.012968                | 0.063135          | 0.140320                    | 0.576945                   | 0.294213               | 0.145071                | 0.008169                | 0.011296                |
| C5               | 0.095270    | 0.131663              | 0.003144             | 0.342100         | 0.073343                | 0.127184                | 0.011153                | 0.067682          | 0.156413                    | 0.739478                   | 0.229325               | 0.171114                | 0.006367                | 0.007381                |
| C6               | 0.048385    | 0.007147              | 0.045242             | 0.168300         | 0.061836                | 0.057756                | 0.012432                | 0.074946          | 0.167678                    | 0.652738                   | 1.061021               | 0.130914                | 0.029459                | 0.057564                |
| C7               | 0.105230    | 0.096362              | 0.034140             | 0.321900         | 0.077142                | 0.120660                | 0.013327                | 0.315787          | 0.782337                    | 0.962151                   | 0.516820               | 0.174857                | 0.014349                | 0.024728                |
| C8               | 0.060067    | 0.066693              | 0.066471             | 0.200100         | 0.062138                | 0.047712                | 0.062181                | 0.118869          | 0.294489                    | 0.954334                   | 0.609598               | 0.215257                | 0.016925                | 0.030326                |

|    |              |          |          |              |          |          |          |              |          |          |          |          |          |          |
|----|--------------|----------|----------|--------------|----------|----------|----------|--------------|----------|----------|----------|----------|----------|----------|
| M1 | 0.14<br>4307 | 0.016845 | 0.149594 | 0.08423<br>4 | 0.521572 | 0.332069 | 0.227173 | 0.13351<br>9 | 0.345000 | 0.966578 | 2.049411 | 0.169735 | 0.046422 | 0.060381 |
| M2 | 0.11<br>6998 | 0.163972 | 0.271754 | 0.03357<br>3 | 0.257363 | 0.171147 | 0.135178 | 0.13308<br>7 | 0.304496 | 1.168841 | 0.506306 | 0.061793 | 0.027954 | 0.102324 |
| M3 | 0.19<br>9954 | 0.122249 | 0.034214 | 0.04240<br>1 | 0.196648 | 0.343407 | 0.157190 | 0.13319<br>1 | 0.042016 | 0.766663 | 1.227298 | 0.427847 | 0.031656 | 0.056911 |
| M4 | 0.10<br>6876 | 0.222079 | 0.047995 | 0.03379<br>7 | 0.341921 | 0.173537 | 0.156375 | 0.13318<br>7 | 0.341110 | 0.885397 | 0.587518 | 0.298771 | 0.036256 | 0.059417 |
| M5 | 0.07<br>6646 | 0.191401 | 0.213649 | 0.03203<br>7 | 0.297279 | 0.473160 | 0.194228 | 0.13336<br>5 | 0.301096 | 1.089326 | 0.785859 | 0.110740 | 0.077459 | 0.078374 |
| M6 | 0.28<br>2166 | 0.039222 | 0.048829 | 0.04551<br>7 | 0.526530 | 0.463587 | 0.071544 | 0.13278<br>8 | 0.475487 | 1.369013 | 1.755354 | 0.031545 | 0.037884 | 0.128004 |
| M7 | 0.09<br>0984 | 0.174595 | 0.020613 | 0.05082<br>1 | 0.106062 | 0.431989 | 0.120729 | 0.13301<br>9 | 0.801213 | 0.952897 | 2.966760 | 0.331218 | 0.024970 | 0.072683 |
| M8 | 0.38<br>3365 | 0.039903 | 0.160649 | 0.06541<br>0 | 0.104986 | 0.382526 | 0.100447 | 0.13292<br>4 | 0.325709 | 0.887459 | 0.337206 | 0.442694 | 0.042818 | 0.040369 |
| B1 | 0.00<br>0000 | 0.473903 | 0.289430 | 0.03100<br>5 | 0.036709 | 0.111354 | 0.189739 | 0.91549<br>3 | 0.568658 | 0.611447 | 0.682230 | 0.252336 | 0.038061 | 0.009169 |
| B2 | 0.93<br>1272 | 0.001219 | 0.000141 | 0.02497<br>4 | 0.014516 | 0.519549 | 0.071422 | 0.34461<br>2 | 0.564038 | 0.721213 | 0.839857 | 0.732636 | 0.069547 | 0.033721 |
| B3 | 0.00<br>0000 | 0.000852 | 0.000161 | 0.02459<br>7 | 0.060084 | 0.195570 | 0.057906 | 0.21727<br>5 | 0.257350 | 0.551778 | 0.322220 | 0.377797 | 0.038498 | 0.040958 |
| B4 | 0.00<br>0000 | 0.000316 | 0.000344 | 0.02438<br>7 | 0.045820 | 0.123305 | 0.039571 | 0.27939<br>7 | 0.570224 | 0.736988 | 0.251154 | 0.264671 | 0.021753 | 0.054675 |
| B5 | 0.00<br>0000 | 0.000090 | 0.000168 | 0.02777<br>1 | 0.063114 | 0.158560 | 0.034032 | 0.19093<br>3 | 0.508074 | 0.907266 | 1.162021 | 0.383068 | 0.030219 | 0.039413 |
| B6 | 0.00<br>0000 | 0.000484 | 0.000206 | 0.02485<br>3 | 0.017572 | 0.103873 | 0.045031 | 0.19621<br>7 | 0.385786 | 1.255288 | 0.510781 | 0.213515 | 0.026612 | 0.065410 |
| B7 | 0.00<br>0000 | 0.000944 | 0.000111 | 0.02687<br>9 | 0.049374 | 0.108356 | 0.037935 | 0.16420<br>3 | 0.340991 | 0.348082 | 0.566017 | 0.181056 | 0.023422 | 0.040609 |
| B8 | 0.00<br>0000 | 0.001262 | 0.000190 | 0.02947<br>8 | 0.038694 | 0.093186 | 0.040667 | 0.18303<br>5 | 0.437052 | 0.271313 | 0.667627 | 1.022638 | 0.015402 | 0.047464 |

C-CON group, M-NASH group, B-BBR group

### Supplementary Table 3 Liver BA levels

| Metabolites (ng/mg) | cholic acid  | chenodeoxycholic acid | ursodeoxycholic acid | deoxycholic acid | tauro $\alpha$ -muricholic acid | tauro $\beta$ -muricholic acid | tauro $\omega$ -muricholic acid | tauro-cholic acid | tauro-chenodeoxycholic acid | tauro-ursodeoxycholic acid | tauro-deoxycholic acid | tauro $\alpha$ -muricholic acid | tauro $\beta$ -muricholic acid | tauro $\omega$ -muricholic acid |
|---------------------|--------------|-----------------------|----------------------|------------------|---------------------------------|--------------------------------|---------------------------------|-------------------|-----------------------------|----------------------------|------------------------|---------------------------------|--------------------------------|---------------------------------|
| Abbreviation        | CA           | CDCA                  | UDCA                 | DCA              | $\alpha$ MCA                    | $\beta$ MCA                    | $\omega$ MCA                    | TCA               | TCDC                        | TUDCA                      | TDCA                   | T $\alpha$ MCA                  | T $\beta$ MCA                  | T $\omega$ MCA                  |
| C1                  | 0.01<br>8419 | 0.009655              | 0.016924             | 0.00576<br>5     | 0.057957                        | 0.051861                       | 0.039769                        | 8.09014<br>3      | 1.659384                    | 0.420422                   | 0.001747               | 0.018419                        | 0.872347                       | 18.354465                       |

|    |              |          |          |              |          |           |          |               |          |          |          |          |           |           |
|----|--------------|----------|----------|--------------|----------|-----------|----------|---------------|----------|----------|----------|----------|-----------|-----------|
| C2 | 0.01<br>4357 | 0.017151 | 0.016582 | 0.00479<br>6 | 0.066982 | 0.045778  | 0.048928 | 14.8502<br>17 | 1.636236 | 0.237968 | 0.002305 | 0.014357 | 0.798909  | 4.194853  |
| C3 | 0.06<br>6424 | 0.011599 | 0.015451 | 0.01084<br>8 | 0.025125 | 0.072292  | 0.061491 | 14.2564<br>72 | 1.983565 | 0.143575 | 0.003764 | 0.066424 | 0.992525  | 1.770816  |
| C4 | 0.03<br>2355 | 0.008803 | 0.013682 | 0.00645<br>5 | 0.040765 | 0.121814  | 0.042801 | 13.2119<br>00 | 3.226920 | 0.142737 | 0.002138 | 0.032355 | 0.904235  | 17.237683 |
| C5 | 0.03<br>8163 | 0.008234 | 0.011877 | 0.00750<br>6 | 0.070220 | 0.049520  | 0.039861 | 10.1475<br>77 | 2.500064 | 0.175295 | 0.001187 | 0.038163 | 0.767099  | 12.851544 |
| C6 | 0.02<br>9197 | 0.008862 | 0.006122 | 0.00746<br>7 | 0.053215 | 0.052453  | 0.043415 | 8.99875<br>9  | 2.239067 | 0.145894 | 0.001776 | 0.029197 | 0.684224  | 23.346205 |
| C7 | 0.03<br>8998 | 0.008401 | 0.012283 | 0.00927<br>5 | 0.082058 | 0.046295  | 0.052500 | 21.7082<br>26 | 2.464570 | 0.434251 | 0.003009 | 0.038998 | 0.401861  | 20.121211 |
| C8 | 0.04<br>8008 | 0.011935 | 0.006207 | 0.00341<br>6 | 0.050079 | 0.006388  | 0.034436 | 6.57190<br>5  | 1.221394 | 0.146258 | 0.001674 | 0.048008 | 0.535600  | 4.123222  |
| M1 | 0.08<br>7420 | 0.009544 | 0.015823 | 0.00278<br>1 | 0.149962 | 10.603037 | 0.068316 | 23.4987<br>81 | 0.775175 | 0.349970 | 0.326779 | 1.381419 | 0.599295  | 3.188400  |
| M2 | 0.08<br>3599 | 0.016351 | 0.009322 | 0.00260<br>4 | 0.125494 | 16.890963 | 0.198350 | 42.9380<br>23 | 2.850856 | 0.848336 | 2.262561 | 1.564367 | 0.640305  | 2.436213  |
| M3 | 0.09<br>0171 | 0.038298 | 0.009828 | 0.00389<br>4 | 0.046374 | 9.844135  | 0.102283 | 23.7685<br>26 | 3.462635 | 0.406106 | 1.579979 | 1.791654 | 0.691254  | 4.235961  |
| M4 | 0.09<br>1207 | 0.010633 | 0.023906 | 0.00185<br>0 | 0.130992 | 14.725483 | 0.071655 | 13.4300<br>88 | 4.622288 | 0.543204 | 0.585623 | 3.827836 | 1.991312  | 3.682901  |
| M5 | 0.09<br>2478 | 0.015180 | 0.034134 | 0.00257<br>2 | 0.265442 | 3.983347  | 0.103710 | 18.6569<br>39 | 3.332043 | 1.213341 | 0.166816 | 1.872132 | 0.709294  | 6.523022  |
| M6 | 0.15<br>8362 | 0.012483 | 0.004769 | 0.00169<br>6 | 0.193913 | 13.539170 | 0.049018 | 14.4605<br>00 | 3.433153 | 2.050693 | 1.751563 | 1.233939 | 1.156774  | 4.287261  |
| M7 | 0.07<br>4174 | 0.032112 | 0.021660 | 0.00214<br>6 | 0.160541 | 4.031444  | 0.276863 | 9.50937<br>4  | 4.012656 | 0.233085 | 2.341076 | 2.115934 | 2.898316  | 1.300640  |
| M8 | 0.09<br>8588 | 0.023647 | 0.008862 | 0.00151<br>3 | 0.173948 | 2.403781  | 0.057806 | 16.4297<br>69 | 5.529858 | 1.416600 | 0.897602 | 2.294055 | 0.550785  | 6.461602  |
| B1 | 0.27<br>2546 | 0.043309 | 0.018081 | 0.00186<br>1 | 0.237974 | 2.351145  | 0.367851 | 15.0763<br>52 | 1.624947 | 0.116448 | 4.103895 | 0.727841 | 10.101545 | 1.283266  |
| B2 | 0.33<br>8598 | 0.020575 | 0.026451 | 0.00452<br>8 | 0.029561 | 2.404422  | 0.138467 | 9.07198<br>0  | 3.117708 | 0.258020 | 3.632074 | 1.146283 | 15.148044 | 2.036875  |
| B3 | 0.62<br>3725 | 0.028601 | 0.050333 | 0.00646<br>5 | 0.178532 | 1.395440  | 0.087302 | 15.8690<br>23 | 1.163214 | 0.229898 | 1.291551 | 1.325517 | 16.678520 | 3.021500  |
| B4 | 0.30<br>9714 | 0.018864 | 0.035794 | 0.00090<br>3 | 0.173717 | 1.217449  | 0.112263 | 19.3482<br>07 | 3.463645 | 0.154295 | 4.914694 | 0.606053 | 8.556795  | 3.066523  |
| B5 | 0.30<br>5611 | 0.023864 | 0.020388 | 0.00410<br>2 | 0.058790 | 1.131712  | 0.076718 | 16.4871<br>75 | 2.428372 | 0.197761 | 0.670039 | 0.926908 | 12.002840 | 1.786599  |
| B6 | 0.26<br>8977 | 0.016827 | 0.018978 | 0.00167<br>8 | 0.067935 | 0.822526  | 0.065978 | 11.4927<br>28 | 1.211828 | 0.174564 | 0.947392 | 0.559634 | 11.056676 | 2.457762  |
| B7 | 0.36<br>9639 | 0.030922 | 0.051338 | 0.00299<br>7 | 0.167617 | 1.048406  | 0.073544 | 15.4922<br>00 | 1.600553 | 0.257312 | 3.627013 | 1.058295 | 13.413971 | 1.513300  |
| B8 | 0.31<br>4390 | 0.028960 | 0.017563 | 0.00176<br>5 | 0.045874 | 1.002980  | 0.078841 | 13.4708<br>20 | 2.398368 | 0.255221 | 3.461662 | 1.109314 | 13.961923 | 2.283134  |

C-CON group, M-NASH group, B-BBR group

Supplementary Figure 1

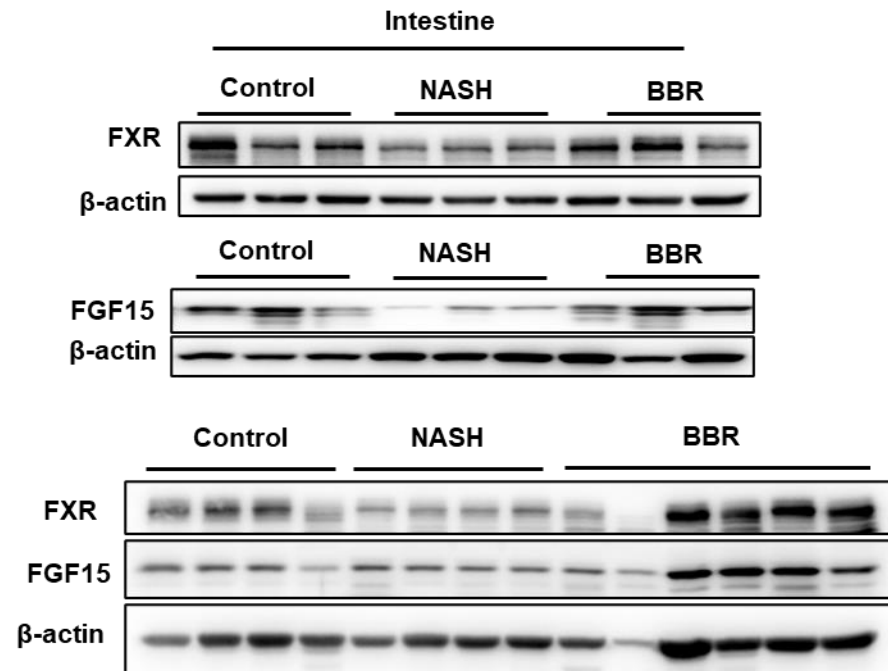

Figure S1. Repeats of Figure 4A

Supplementary Figure 2

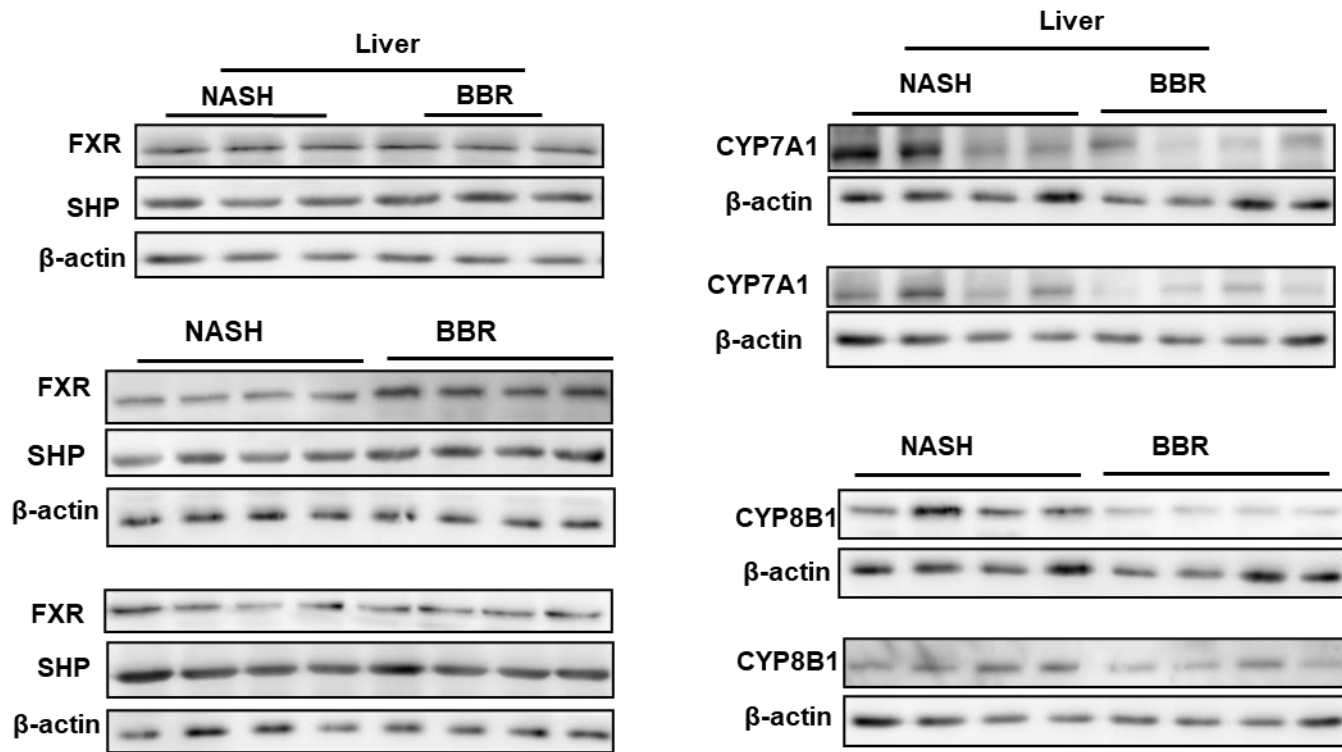

Figure S2. Repeats of Figure 4D

Supplementary Figure 3

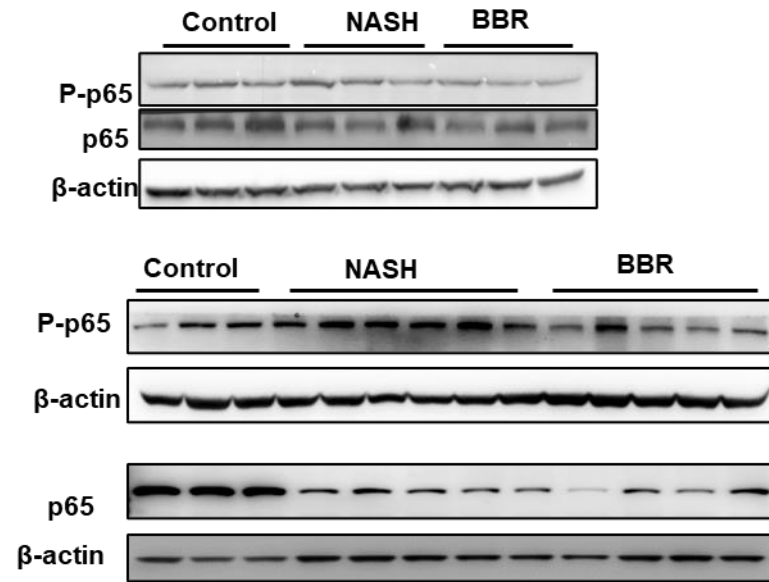

Figure S3. Repeats of Figure 5B
